# Supplementary material for: Ab initio molecular dynamics simulations of water and an excess proton in water confined in carbon nanotubes
Source: Royal Society of Chemistry journal article supplement (doi:10.1039/c4cp00415a), 2014-07-11
Supplement: c4cp00415a1.pdf [file c4cp00415a1.pdf]

## *Ab initio* Molecular Dynamics Simulations of Water and an Excess Proton in Water Confined in Carbon Nanotubes

Jeffrey K. Clark II and Stephen J. Paddison\*

<sup>†</sup>Department of Chemical and Biomolecular Engineering, University of Tennessee, Knoxville, TN 37996

### Supplementary Information

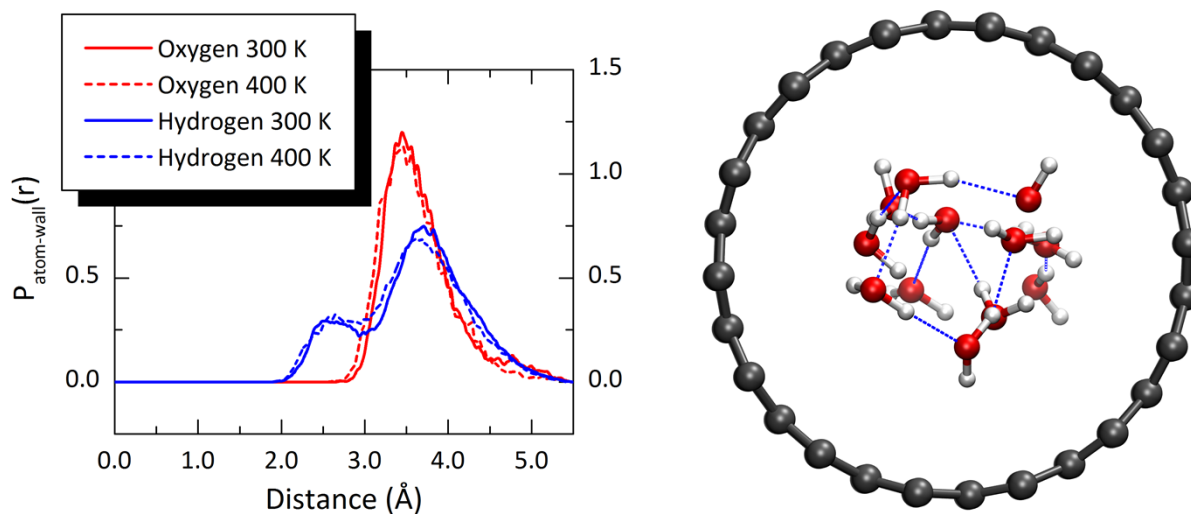

**Figure S1.** (Left) Distribution function of the axial distance of the oxygen and hydrogen atoms from the inner wall of the CNT for N-14 at 300 and 400 K and (right) snapshot of N-14 at 400 K down the CNT axis. Hydrogen bonds are denoted by dashed lines.

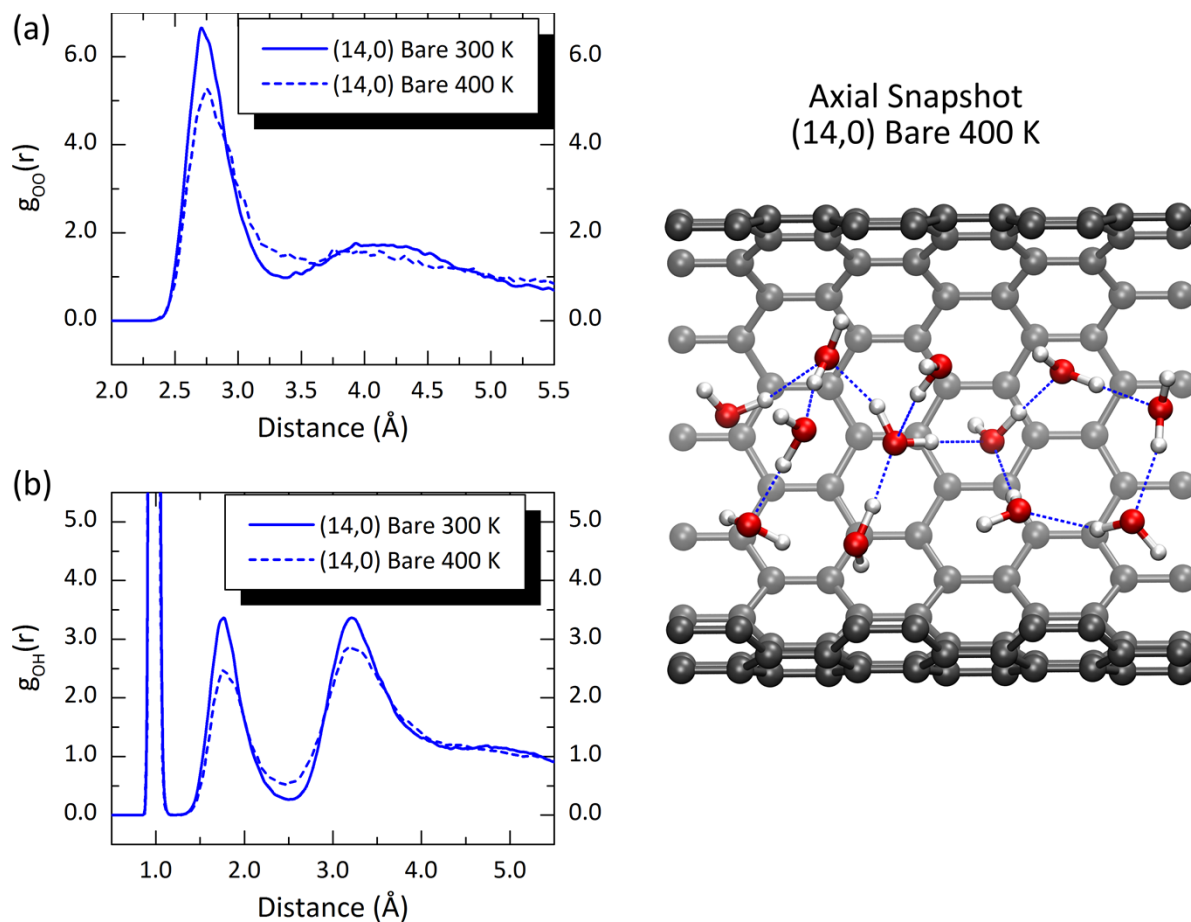

**Figure S2.** (a) Oxygen–oxygen and (b) oxygen–hydrogen radial distribution functions for N-14 at 300 and 400 K with a representative axial snapshot at 400 K shown in the right panel.

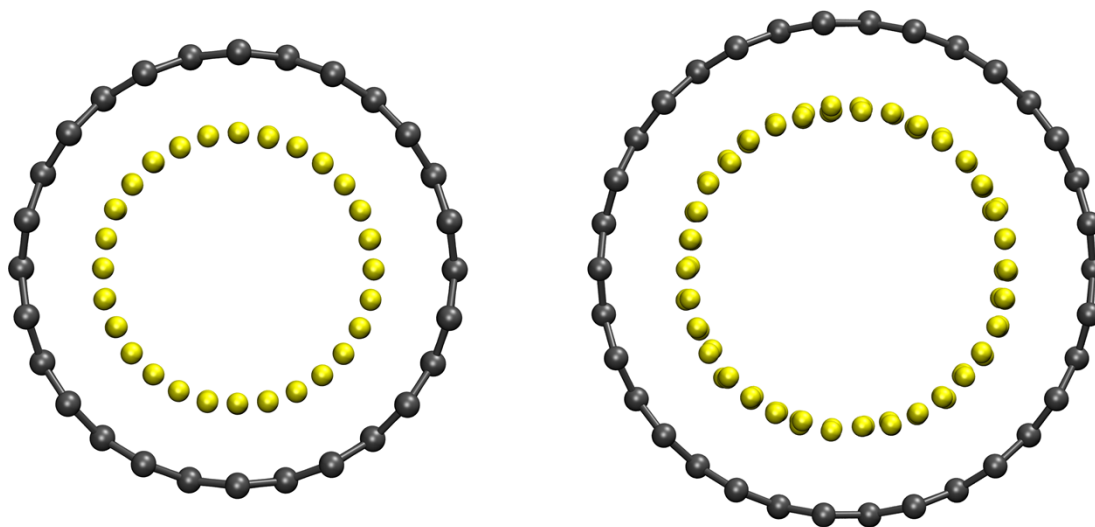

(a)

(b)

**Figure S3.** Relaxed structures under loose convergence criteria of the fluorinated CNTs for (a) F-14 and (b) F-17.
